# Supplementary material
Source: PubMed Central journal article supplement (PMC3228837)
Supplement: NIHMS332154-supplement-1_si_001.pdf [file NIHMS332154-supplement-1_si_001.pdf]

# Supporting Information

## Lactam-stabilized helical analogues of the analgesic $\mu$ -conotoxin KIIIA

**Keith K. Khoo<sup>‡§¥</sup>, Michael J. Wilson<sup>||</sup>, Brian J. Smith<sup>§</sup>, Min-Min Zhang<sup>||</sup>, Jozsef Gulyas<sup>#</sup>, Doju Yoshikami<sup>||</sup>, Jean E. Rivier<sup>#</sup>, Grzegorz Bulaj<sup>||</sup>, and Raymond S. Norton<sup>‡\*</sup>**

*Medicinal Chemistry and Drug Action, Monash Institute of Pharmaceutical Sciences, Monash University (Parkville campus), 381 Royal Parade, Parkville VIC 3052, Australia; The Walter & Eliza Hall Institute of Medical Research, 1G Royal Parade, Parkville, VIC 3052, Australia; The Department of Medical Biology, The University of Melbourne, Parkville, Victoria 3010, Australia; Department of Biology, University of Utah, Salt Lake City, Utah 84112, USA; The Clayton Foundation Laboratories for Peptide Biology, The Salk Institute for Biological Studies, 10010 North Torrey Pines Road, La Jolla, CA 92037, USA; Department of Medicinal Chemistry, College of Pharmacy, University of Utah, Salt Lake City, Utah 84108, USA*

Running title: *Lactam analogues of the analgesic  $\mu$ -conotoxin KIIIA*

\* To whom correspondence should be addressed: Email: [ray.norton@monash.edu.au](mailto:ray.norton@monash.edu.au) Phone: +61 3 9903 9167. Fax: +61 3 9903 9582.

§ The Walter & Eliza Hall Institute of Medical Research

¥ The University of Melbourne

‡ Monash University

# Salk Institute

||, || University of Utah

## Contents

|                                                                                                                     |    |
|---------------------------------------------------------------------------------------------------------------------|----|
| Table SI-1: Chemical shifts and $^3J_{\text{NHC}\alpha\text{H}}$ coupling constants for Peptides <b>1 – 8</b> ..... | S2 |
| Table SI-2: Characterization of Peptides <b>1 – 8</b> by MS, CE and RP-HPLC.....                                    | S3 |
| Fig. SI-1: Summary of NOE connectivities for D9K13 lactam analogue (Peptide <b>6</b> ).....                         | S4 |
| Fig. SI-2: Trajectory snapshots of MD simulations.....                                                              | S5 |
| Fig. SI-3: Percent helical occupancy during MD simulations.....                                                     | S6 |

**Table SI-1** Chemical shifts (NH and C $\alpha$ H) and  $^3J_{\text{NHC}\alpha\text{H}}$  coupling constants for Peptides 1 - 8 at 5 °C, pH 2.7.  $^3J_{\text{NHC}\alpha\text{H}}$  coupling constants were measured from 1D spectra except in the case of overlapped peaks (<sup>a</sup>) which were measured from a DQF-COSY spectrum. Single peak annotation denotes coupling constants too small to be measured from 1D spectra. <sup>n.d.</sup> The Asp7 resonance in D7K11 was not observed

Peptide 1 (K5D9)

|       | NH   | C $\alpha$ H | $^3J_{\text{NHC}\alpha\text{H}}$ (Hz) |
|-------|------|--------------|---------------------------------------|
| Lys5* | 8.47 | 4.26         | single peak                           |
| Ser6  | 8.75 | 4.26         | 2.2                                   |
| Lys7  | 8.10 | 4.03         | 5.6                                   |
| Trp8  | 8.34 | 4.35         | 4.2                                   |
| Asp9* | 9.35 | 4.65         | 3.6                                   |
| Arg10 | 7.94 | 4.16         | 5.6                                   |
| Asp11 | 7.97 | 4.53         | 6.9                                   |
| His12 | 7.70 | 4.51         | 9.1 <sup>a</sup>                      |
| Ser13 | 8.00 | 4.47         | 6.8                                   |
| Arg14 | 8.56 | 4.34         | 7.5                                   |

Peptide 2 (D5K9)

|       | NH   | C $\alpha$ H | $^3J_{\text{NHC}\alpha\text{H}}$ (Hz) |
|-------|------|--------------|---------------------------------------|
| Asp5* | 8.89 | 4.55         | 3.5                                   |
| Ser6  | 8.95 | 4.09         | single peak                           |
| Lys7  | 8.00 | 4.06         | 5.6 <sup>a</sup>                      |
| Trp8  | 7.88 | 4.38         | 4.9                                   |
| Lys9* | 9.24 | 3.96         | 4.1                                   |
| Arg10 | 7.72 | 4.11         | 5.6                                   |
| Asp11 | 7.96 | 4.53         | 7.4 <sup>a</sup>                      |
| His12 | 7.77 | 4.45         | 8.6                                   |
| Ser13 | 7.98 | 4.43         | 6.3 <sup>a</sup>                      |
| Arg14 | 8.50 | 4.35         | 7.3                                   |

Peptide 3 (K7D11)

|        | NH   | C $\alpha$ H | $^3J_{\text{NHC}\alpha\text{H}}$ (Hz) |
|--------|------|--------------|---------------------------------------|
| Lys7*  | 8.54 | 4.01         | single peak                           |
| Trp8   | 8.86 | 4.22         | single peak                           |
| Ala9   | 8.70 | 4.12         | 4.2                                   |
| Arg10  | 7.88 | 4.06         | 5.3                                   |
| Asp11* | 8.35 | 4.55         | 6.5                                   |
| His12  | 7.61 | 4.46         | 9.2                                   |
| Ser13  | 7.84 | 4.44         | 6.6                                   |
| Arg14  | 8.45 | 4.33         | 7.3                                   |

Peptide 4 (D7K11)

|        | NH   | C $\alpha$ H | $^3J_{\text{NHC}\alpha\text{H}}$ (Hz) |
|--------|------|--------------|---------------------------------------|
| Asp7*  | -    | -            | - <sup>n.d.</sup>                     |
| Trp8   | 9.75 | 4.61         | 5.9                                   |
| Ala9   | 8.64 | 4.14         | 5.5                                   |
| Arg10  | 8.11 | 4.14         | 6.3                                   |
| Lys11* | 8.06 | 4.14         | 6.5                                   |
| His12  | 8.46 | 4.63         | 7.1 <sup>a</sup>                      |
| Ser13  | 8.36 | 4.42         | 6.6                                   |
| Arg14  | 8.62 | 4.31         | 7.1                                   |

Peptide 5 (K9D13)

|        | NH   | C $\alpha$ H | $^3J_{\text{NHC}\alpha\text{H}}$ (Hz) |
|--------|------|--------------|---------------------------------------|
| Lys7   | 8.56 | 3.91         | 4.1                                   |
| Trp8   | 8.52 | 4.32         | 3.9                                   |
| Lys9*  | 8.38 | 3.99         | 2.9                                   |
| Arg10  | 8.10 | 4.00         | 2.9                                   |
| Asp11  | 8.24 | 4.40         | 5.8                                   |
| His12  | 8.20 | 4.17         | 7.2                                   |
| Asp13* | 8.29 | 4.71         | 6.7 <sup>a</sup>                      |
| Arg14  | 7.76 | 4.23         | 7.0                                   |

Peptide 6 (D9K13)

|        | NH   | C $\alpha$ H | $^3J_{\text{NHC}\alpha\text{H}}$ (Hz) |
|--------|------|--------------|---------------------------------------|
| Lys7   | 8.51 | 4.01         | 4.9                                   |
| Trp8   | 8.48 | 4.51         | 4.6                                   |
| Asp9*  | 8.64 | 4.41         | 4.6                                   |
| Arg10  | 8.30 | 3.96         | 5.4 <sup>a</sup>                      |
| Asp11  | 8.13 | 4.53         | 6.7                                   |
| His12  | 8.09 | 4.45         | 7.7 <sup>a</sup>                      |
| Lys13* | 8.08 | 4.31         | 5.9 <sup>a</sup>                      |
| Arg14  | 8.18 | 4.24         | 7.3                                   |

Peptide 7 (K9D13 linear)

|       | NH   | C $\alpha$ H | $^3J_{\text{NHC}\alpha\text{H}}$ (Hz) |
|-------|------|--------------|---------------------------------------|
| Lys7  | 8.47 | 4.00         | overlap                               |
| Trp8  | 8.09 | 4.60         | 6.3                                   |
| Lys9  | 7.93 | 4.08         | 6.5                                   |
| Arg10 | 8.18 | 4.18         | 6.4                                   |
| Asp11 | 8.40 | 4.58         | 6.9                                   |
| His12 | 8.51 | 4.58         | 7.6                                   |
| Asp13 | 8.46 | 4.64         | overlap                               |
| Arg14 | 8.45 | 4.26         | overlap                               |

Peptide 8 (D9K13 linear)

|       | NH   | C $\alpha$ H | $^3J_{\text{NHC}\alpha\text{H}}$ (Hz) |
|-------|------|--------------|---------------------------------------|
| Lys7  | 8.35 | 4.06         | 5.8                                   |
| Trp8  | 8.25 | 4.68         | 6.8                                   |
| Asp9  | 8.28 | 4.60         | overlap                               |
| Arg10 | 8.28 | 4.12         | overlap                               |
| Asp11 | 8.28 | 4.57         | overlap                               |
| His12 | 8.28 | 4.59         | overlap                               |
| Lys13 | 8.41 | 4.29         | 6.7                                   |
| Arg14 | 8.57 | 4.24         | 7.0                                   |

**Table SI-2** Characterization of Peptides **1 – 8** by Mass Spectroscopy, Capillary Electrophoresis and RP-HPLC.

| Peptide   | Calculated [M+H] <sup>+</sup> | Observed [M+H] <sup>+</sup> <sup>a</sup> | % Purity by HPLC <sup>b</sup> | % Purity by CE <sup>c</sup> | Yield <sup>d</sup> (mg) |
|-----------|-------------------------------|------------------------------------------|-------------------------------|-----------------------------|-------------------------|
| <b>1</b>  | 1337.68                       | 1337.56                                  | 99                            | 96                          | 4.9                     |
| <b>2</b>  | 1337.68                       | 1337.59                                  | 99                            | 97                          | 17.8                    |
| <b>3</b>  | 1078.56                       | 1078.46                                  | 98                            | 98                          | 9.8                     |
| <b>4</b>  | 1078.56                       | 1077.65                                  | NA                            | 77                          | 18.8                    |
| <b>5</b>  | 1163.62                       | 1163.52                                  | 98                            | 97                          | 13.5                    |
| <b>6</b>  | 1163.62                       | 1163.77                                  | NA                            | 86                          | 10.6                    |
| <b>7*</b> | 1181.33                       | 1181.50                                  | 99                            | NA                          | NA                      |
| <b>8*</b> | 1181.33                       | 1181.78                                  | 99                            | NA                          | NA                      |

\*Commercially available. NA, not available.

<sup>a</sup> Mass spectra (MALDI-MS) were measured on an ABI-Perseptive DE-STR instrument in positive reflector mode.

<sup>b</sup> Quantitative RP-HPLC was performed using a HP1090 instrument and a Grace Vydac C18 column (2 x 150 mm, 5 μm particle size, 300 Å pore size). The solvent system was comprised of eluent A = TEAP at pH 2.25, eluent B = 60% CH<sub>3</sub>CN, 40% A. A gradient was performed from 5% B to 45% B in 30 min at a flow rate of 0.2 mL/min.

<sup>c</sup> Capillary electrophoresis (CE) was performed using a Beckman PACE 5500 instrument. The electrophoresis buffer was 0.1 M sodium phosphate (15% acetonitrile), pH 2.5. Separation was accomplished by application of 20 kV to the capillary (0.75 μm x 50 cm). Detection was at 214 nm. Impurities in peptides **4** and **6**, which were not analysed by RP-HPLC, were detected by CE; accordingly, the potencies of these analogues could be slightly higher than reported.

<sup>d</sup> Yield obtained based on 0.2 mmol scale synthesis as described in Experimental procedures.

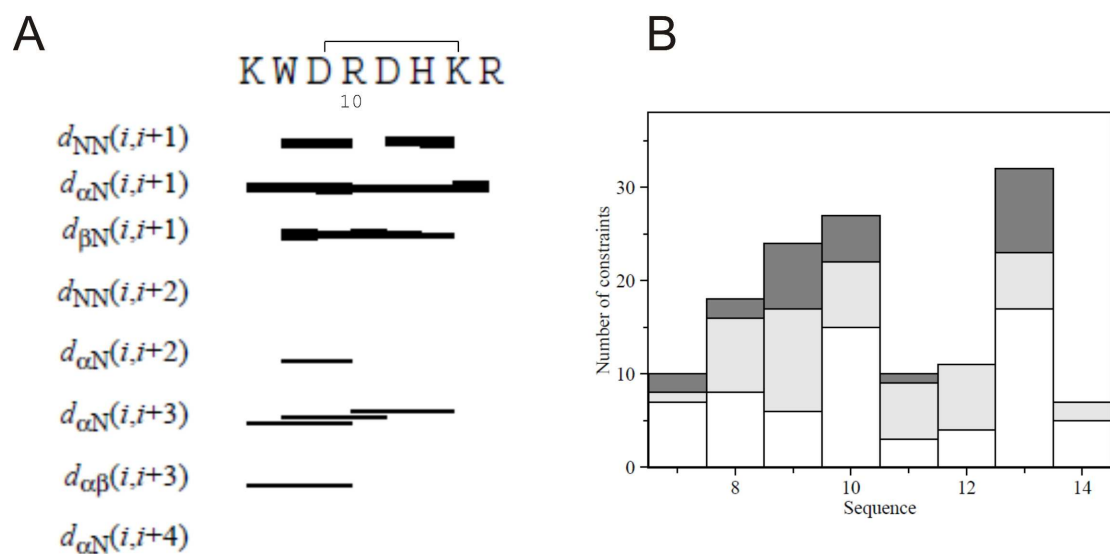

**Fig. SI-1:** Summary of (A) sequential and short-range NOE connectivities and (B) number of short-range (dark grey), sequential (light grey) and intra-residue (white) NOE restraints plotted as a function of residue number following preliminary structure calculations in CYANA for D9K13 lactam-stabilized peptide (**6**). Intensities of sequential  $d_{\text{NN}}$ ,  $d_{\alpha\text{N}}$  and  $d_{\beta\text{N}}$  connectivities are indicated by the height of the bars.

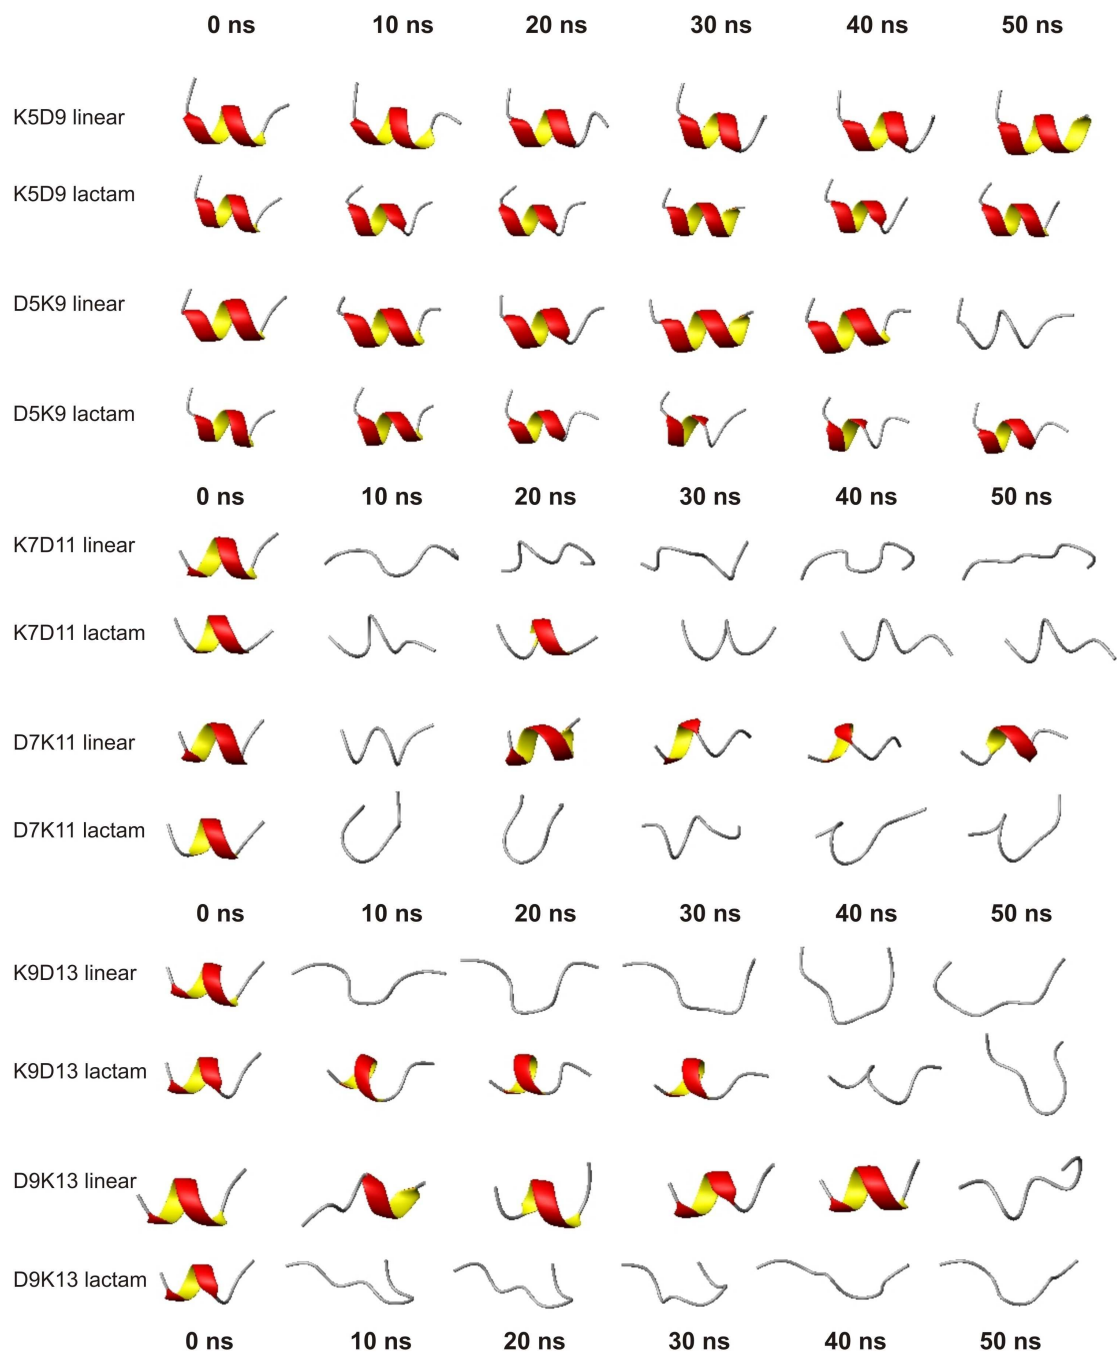

**Fig. SI-2:** Trajectory snapshots of MD simulation (50 ns) for each lactam analogue and its linear counterpart, taken at 10 ns time intervals.

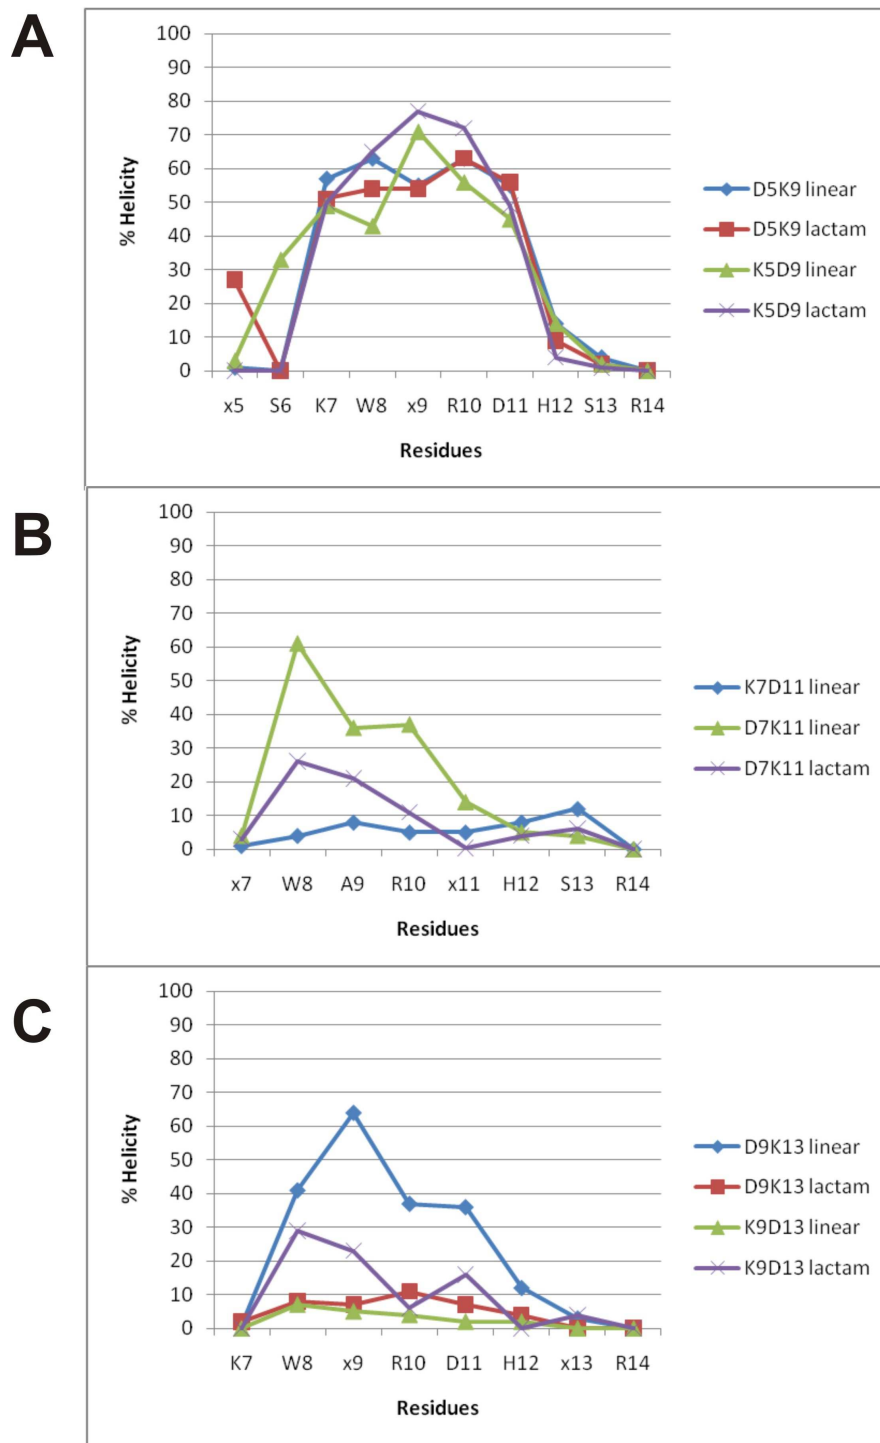

**Fig. SI-3:** Percent helical occupancy for each residue of the minimized linear and lactam stabilized analogues of  $\mu$ -KIIIA for (A) 5-9 analogues, (B) 7-11 analogues and (C) 9-13 analogues through 50 ns of MD simulation. Percentage helicity was calculated using the `g_helix` function in GROMACS.
